# Supplementary material for: Physical, psychological, sexual, and systemic abuse of children with disabilities in East Africa: Mapping the evidence
Source: PLoS One. 2017 Sep 11;12(9):e0184541. doi: 10.1371/journal.pone.0184541 (PMC5593191; doi:10.1371/journal.pone.0184541)
Supplement: S2 Appendix — (XLSX) [file pone.0184541.s002.xlsx]

## Sheet: Sheet1
																											Coding for map
	CITATION DETAIL				DESCRIPTION OF EVIDENCE						CONTEXT					MAP CODES								INTERVENTION (where relevant)
	Study ID	Author	Study title	Pub date	Dimension of evidence	Type of literature	Broad topic	Study objective	Study design	Weight of evidence	Country (urban/rural)	Socio-economic	Gender	Access to services	Population	Condition	Attitudes/Beliefs	Knowledge	Type of abuse	Effect of abuse (if stated)	Risk factor	Protective factors	Protective factors (recommended)	Applied programme (components)	Programme logic	Effects of intervention	DISABILITY CATEGORY of study								PHYSICAL
																											Endocrine, nutritional, and metabolic [ICD 10:5E00-E90, incl. Albinism [E70.3]]	Blindness [ICD 10: H53-H54]	Deafness [ICD 10: H90-H95]	Mental and behavioural disorders [ICD 10: F00-F99]	Nodding Syndrom	Diseases of the nervous system [ICD 10: G00-G99, incl. Epilepsy [G40], Cerebral palsy [G80], and Hydrocephalus [G91]]	Congenital malformations, deformations and chromosomal abnormalities [ICD 10: Q00-Q99, incl. Spina bifida [Q05]]	Condition unspecified [as 'disability' or clustered]	Mutikillings/abduction	mutilation	mercy killings	forced exposure to sun	beatings/burnings	not taken to public places	targeted for witchcraft & abuse through traditional practices and witchcraft & phyisical mistreatment in traditional health care system	corporal pusnithment for mistakes	abandonment of child by cargivers	Children being hidden to safeguard family reputation or out of shame	Inappropriate medical practices	Extreme neglect	Children being hidden to keep them safe from attackes	Forced sterilisation	Denied food or denied breastfeeding
1	row 4	Hanass-Hancock et al	Disability and HIV/AIDS - a systematic review of literature on Africa	2009	Dimension 3	Academic (Journal article)	Disability and HIV and abuse	To review the evidence on the relation between disabiilty and HIV transmission in Africa	Systematic review	High trustworthiness; moderate relevance	n/a	n/a	n/a	n/a	n/a	Disability (not specified)	n/a		Sexual abuse: The Ugandan survey, in which 371 people with disabilities participated, revealed that 55% of people with disabilities perceived themselves as at risk of contracting HIV [7]. Similarly, Ngazie's study in Zimbabwe, with 67 participants in an urban area, showed that 75% of participants perceived themselves to be at risk [29]. In a Kenyan study of 1709 deaf people, 80% perceived themsel…	Effects: It is often argued that people with disabilities have less knowledge about HIV as they have less access to HIV information and interventions. Studies which have used comparison groups can successfully argue this case. This argument becomes even stronger with the recently released national South African study [59] indicating that people with disabilities have the lowest HIV knowledge of a…	Although sexual abuse is a reality for many people with disabilities in Africa, only a few cases are reported. In the Ethiopian study [52], few cases were reported to the police (18%), because people fear that they will not be believed or that they will be subjected to further victimization. Similar reasons for non-disclosure were given in other studies [7,16-18,21]. Participants in Phillander an…	n/a	Many studies conclude that disability-specific HIV/AIDS prevention programmes and interventions need to be designed, and mainstream services should be made accessible for people with disabilities [9,12,44,48,58]. Mobilization of, for example, deaf peers showed to be instrumental in gaining confidence to participate in voluntary counselling and testing [27]				0	0	0	0	0	0	0	1	0	0	0	0	0	0	0	0	0	0	0	0	1	0	0
2	row 5	Karangwa et al	The grassroots community in the vanguard of inclusion: the post-genocide Rwandan prospects	2007	Dimension 4; Dimension 2 (minor)	Academic (Journal article)	Disability and CBR & inclusive education in Rwanda	This paper examines the position of the young people with disabilities within the local communities, the challenges and opportunities involved in providing solutions to their limitations.	Case study	Low trustworthiness; low relevance	n/a	A big proportion of the Rwandan population (over 60%) are known to live below the poverty line and as a result, well over 90% of them are subjected to widespread rural poverty, 54% of households survive on only fewer than 0.50 hectares, and a lack clean water, appropriate sanitation and health services. The health and other hazards that are the consequences, are also among the major impairing fac…	n/a	A big proportion of the Rwandan population (over 60%) are known to live below the poverty line and as a result, well over 90% of them are subjected to widespread rural poverty, 54% of households survive on only fewer than 0.50 hectares, and a lack clean water, appropriate sanitation and health services. The health and other hazards that are the consequences, are also among the major impairing fac…	n/a	Disability (not specified)	It is thus observed that the care and responsibility of most of the 4.7% of the Rwandan people with disabilities (Republic of Rwanda, 2003b) is shouldered by their family members, most of whom (94%) are in fact part of the deprived rural population (Republic of Rwanda, 2002b). The national policy on Orphans and Vulnerable Children in Rwanda (Republic of Rwanda, 2002a) was obviously influenced by …		INSTITUTIONAL ABUSE/DISCRIMINATION: The conditions of most of the above categories of children are usually little understood by the Rwandan community because of the general absence of related support mechanisms, as well as the complex socio-economic situation within which they occur (explained in each of the above categories). Studies on disabilities in poor communities comparable with those in R…	n/a	n/a	Personal experiences in East African and Rwandan schools, which include that of Gahini H.S. (Karangwa, 2003; Suubi, 2003) remain the major source of inspiration for consideration of peer-supported learning and inclusive education. The learners with disabilities or other special educational needs benefit from the friendly, individualized interactions in which the material to be learnt, whether soc…	n/a				0	0	0	0	0	0	0	1	0	0	0	0	0	0	0	0	1	0	0	0	0	0	0
3	row 6	Amuyunzu	Willing the Spirits to Reveal Themselves: Rural Kenyan Mothers' Responsibility to Restore Their Children's Health	1998	Dimension 5	Academic (Journal article)	Spiritual beliefs & diseases in Kenya	Investigate traditional healing practices in a Kenyan community	Ethnography	High trustworthiness; low relevance	Kenya (rural)	In May 1992, Lutsangani had a population of 1,430 in 209 households. Of these households, 27 percent were headed by polygynous unions and 20 percent were headed by women who were widows, divorced women, or senior wives in polygynous homes. In many situations, when a man marries a second wife, the first is left to run her household with little interference from her husband. Lutsangani's people are…	Unclear	The main problems experienced by the villagers include underdeveloped communication networks, low levels of education (only 40 percent of the population have ever gone to school), poor sanitation, and low income. Only 29.4 percent of the population earn any income at all, which is generated from casual labor in the town of Mombasa, petty trading, fishing, and farm labor. Levels of morbidity and m…	Women & children consulting traditional healer	Unclear	The Duruma have a wide range of beliefs about disease causation. Some illnesses are seen to occur naturally and are blamed on the Duruma god, mulungu. Such diseases "just come," an aspect that has also been noted by Feierman and Janzen (1992). Illnesses also result from witchcraft, or utsai. A variety of spirits are also blamed for the occurrence of illnesses. They include the disembodied spirits…		No abuse per but medical maltreatment/neglect	Death in cases where disease is not treated	n/a	n/a	n/a				0	0	0	0	0	0	0	1	0	0	0	0	0	0	0	0	1	0	1	0	0	0	0
4	row 9	Aldersley	Family perceptions of intellectual disability: Understanding and support in Dar es Salaam	2012	Dimension 2	Academic (Journal article)	Intellectual Disability and Familiy support	This article outlines and discusses interviews that were conducted in Dar es Salaam, Tanzania, with family members of children and adults with intellectual disabilities. These interviews explore how families came to understand that their child had an intellectual disability; the availability of family support; and family hopes and dreams for the future, and were a part of a wider exploratory stud…	Qualitative, semi-strucured interviews.	Moderate trustworthiness; high relevance	Tanzania (urban)	Mixed	Unclear	Unclear; but complaints about lack of government support	Caregivers of children with intellectual disability. The households represented a wide range of different family structures: single mothers, two-parent households, grandparent-headed households, and households comprising a number of family members (e.g. sisters, brothers, cousins, aunts, uncles) under one roof.	Intellectual disability	First, respondents asserted that Tanzanians have a culture that looks negatively on people with disabilities and that characterises people with disabilities as a ‘bad omen’ for the family. Another father described on a number of occasions that children with intellectual disabilities are targeted and killed by those practicing witchcraft in the community and thus he does not let his son wander on …		In addition to the sub-themes of ‘something is wrong’, ‘seeking a cure’, and ‘acceptance’, respondents discussed understanding their family member’s disability in a setting characterised by ‘stigma’. Families discussed stigma in a number of ways. First, respondents asserted that Tanzanians have a culture that looks negatively on people with disabilities and that characterises people with disabili…		In addition to the sub-themes of ‘something is wrong’, ‘seeking a cure’, and ‘acceptance’, respondents discussed understanding their family member’s disability in a setting characterised by ‘stigma’. Families discussed stigma in a number of ways. First, respondents asserted that Tanzanians have a culture that looks negatively on people with disabilities and that characterises people with disabili…	One way in which parents saw a bright future for their children with disabilities was through the possibility of their child and family member holding gainful employment. A number of families had members with intellectual disabilities in young adulthood. All of these families disclosed that following completion of school, their member with an intellectual disability now just sits at the family ho…	Based upon the above discussion of family strengths, two immediate implications for future practice are apparent. Firstly, healthcare providers and other practitioners should support and encourage families as they search for cause of their child’s exceptionality. Rather than withhold all but ‘necessary’ knowledge about the nature of the child’s impairment or discourage ‘shopping around’ for solut…				0	0	0	1	0	0	0	0	0	0	0	0	0	0	1	0	1	0	0	0	0	0	0
5	row 10	Handicap international	As It Is: access to HIV and AIDS information and services amongst persons with disability.	2009	Dimension 3	Grey literature (Advocay report)	Disability and HIV and abuse	Handicap International commissioned this study to obtain scientifi cally processed information concerning the knowledge, attitude and practice among persons with disabilities on HIV and AIDS in Kenya. The fi ndings of this study will be used to guide the planning and implementation of HIV prevention and management programmes for people with disabilities. It was conducted in Nairobi, Mombasa, Kisu…	Qualitative interviews & prevalance surveys	Low trustworthiness; moderate relevance	Kenya (rural & urban)	Stated as poor, but no further information provided.	Unclear	Unfortunately, mainstream HIV and AIDS intervention programmes largely ignore a good proportion of people with disabilities. The visually impaired, for example, cannot read communication materials unless produced in Braille. Dominant but false societal notion that persons with disability have no sexual desire and that are constantly supervised has made it difficult for them to voice concerns. Out…	Disabled people and their caregivers	Most (69 per cent) of the People with mental disability covered in this survey were in the range of 18 to 35 years. In the case of the blind, deaf and physically challenged, the majority who participated in this study were aged between 25-45 years (67 per cent). The sample was equally distributed across the disability category.		Worse still, wrong perception that persons with disability are not sexually active , unlikely to use drugs or alcohol, and at less risk of violence or rape than their non-disabled peers is shocking. Considering those who claimed that persons with disability are not at risk, perception that persons with disability are discriminated against in sexual relations (44 per cent) and that they are sexual…	People with Mental Disability are most challenged with regard to access to HIV programmes followed by the visually impaired. There is little adaptation of information to suit these disabilities. More than 50 per cent of the caregivers are not making effort of passing information on HIV and AIDS to people with mental disability. The main challenge highlighted across all types of disabilities is st…	Caregivers of persons with mental disability shared the same perception with 82 per cent feeling that a person with mental disability is at a higher risk of contracting HIV. It is interesting to note that 100 per cent of the deaf response mentioned lack of access of information put them at risk as compared to the blind (41 per cent) and persons with physical disability (47 per cent), this could i…	Limited choice of patners assumed to increase risk of sexual abuse.						0	1	1	0	0	0	0	0	0	0	0	0	0	0	0	0	0	0	0	0	0	0	0
6	row 11	Karangwa et al	Community‐level Responses to Disability and Education in Rwanda	2010	Dimension 2; dimension4 minor	Academic (Journal article)	Disability and familiy perception and educational access	In this article we explore the meaning of community and community solidarity, and perceptions of disability, in rural and urban Rwandan contexts, in relatively affluent and economically deprived families. The overarching question guiding the study was: “What opportunities for inclusive learning exist for young people with disabilities in post-genocide Rwandan communities?”	Ethnography	High trustworthiness; moderate relevance	Rwanda (rural & ruban)	in rural and urban Rwandan contexts, in relatively affluent and economically deprived families.	Unclear	No special provision for disabled children to attend school, which in practice meant that they were often excluded. The study was set in the context of Rwanda’s education policy, which aims to develop an education system that is responsive to all learners based on an international discourse of human rights.	Teachers, learners and care givers of disabled children as well as community members.	Mixed	The study found that disabilities are perceived in relation to the influence they have on the functional life and activities of a person with a disability. This level of functioning designates his or her place within the family and the general community. People with disabilities tend to be referred to by this function, or lack of it. This involves the use of the prefixes “ik-”, “ek-”, “ka-” and “…		Children with disabilities are often unable to attend their nearest neighbourhood school as it may be located up to 10 kilometres away from their homes. In addition, discriminatory attitudes among students and staff, communication barriers for those who are deaf and blind, lack of support for teachers, and inaccessible school infrastructure (Republic of Rwanda, 2007) make school attendance extrem…			The people of Rwanda share a well-entrenched culture of strong extended family bonds and a spirit of mutual support (Kagame, 1954; Nothomb, 1965). Although Kagame and Nothomb were writing several decades before the genocide, there is evidence that traditional forms of social assistance, or community solidarity, known in Rwanda as “ubumwe”, are still strong features of everyday life. For example, …					0	0	0	0	0	0	0	1	0	0	0	0	0	0	0	0	0	0	0	0	0	0	0
7	row 12	Bryecon et al	Miners' magic: artisanal mining, the albino fetish and murder in Tanzania	2010	Dimension 5	Academic (Journal article)	Albino killings and minors' beliefs	Through the concept of fetish creation, this article interrogates the agency of those involved in the murders :	Qualitative, semi-strucured interviews.	Low trustworthiness; high relevance.	Tanzania (rural)	Poor mining communities	Male miners; mixed for traditional healers	n/a	Miners and traditional healers	Albinoism		Miners seeking luck and protection make lucrative payments to waganga who are rewarded recognition for their power in the realm of the supernatural. Through market forces of supply and demand, in effect, they have mutually created the albino fetish. There are sufficient shared material concerns on the part of the waganga and spiritual belief on the part of the miners to motivate them to engage in…	At the time of writing, close to fifty albino murders have been reported over the course of nearly two years from late 2007. Most of the reported deaths occurred in Sukumaland, located in north-west Tanzania, the epicentre of Tanzanian mining activities and homeland of the Sukuma people, the country’s largest ethno-linguistic group, who are renowned in Tanzanian popular culture for their witchcra…	Killings and mutilation of albinos	Work pressure from occupational risks, uncertainties and separation from home experienced by miners, combined with the euphoria of having occasional large sums of cash, influences miners’ behaviour. In contrast to agrarian-based village life where the circulation of cash is typically low, conspicuous consumption of consumer goods, alcohol, gambling and liaisons with women are part of life in arti…	The Tanzanian government has appointed an albino woman, Hon. Al- Shaimaa Kwegyir, as a member of parliament in an attempt to positively influence public attitudes. The Tanzania Albino Society (TAS) estimates there are approximately 8,000 albinos in the country.					1	0	0	0	0	0	0	0	1	1	0	0	0	0	1	0	0	0	0	0	0	0	0
8	row 13	Advantage Africa	An Assessment of the Social, Cultural and Institutional Factors that Contribute to the Sexual Abuse of Persons with Disabilities in East Africa	2015	Dimension 1	Grey literature (interim research report)	Disability and sexual abuse	The research aim of the project is to investigate the social, cultural and institutional factors which contribute to the high incidence of sexual abuse of persons with disabilities in East Africa and to identify interventions which could change detrimental attitudes, beliefs and practices which perpetuate this high incidence	Qualitative interviews & focus groups	Low trustworthiness; high relevance.	East Africa	Stated as poor, but no further information provided.	2 females victims of abuse (otherwise, unclear)	Research respondents explained that the severely negative attitudes to disability in East Africa are a major reason why crimes against persons with disabilities are not reported or followed up. Persons with disabilities and their families have become accustomed to being discriminated against and not receiving respect or equal treatment from service providers from most departments and at all level…	Advocay groups; minority of particiants are disabled	Not specified; Link between learning disability and gifts for sex	Research respondents explained that the severely negative attitudes to disability in East Africa are a major reason why crimes against persons with disabilities are not reported or followed up. Persons with disabilities and their families have become accustomed to being discriminated against and not receiving respect or equal treatment from service providers from most departments and at all level…		Sexual abuse: Two local survivors of sexual abuse, who had disabilities, told their stories at the workshop A representative of a national organisation (Women Challenged to Challenge) pointed out that the rates of sterilisation of women with disabilities are very high (19% compared to 4.6% of non-disabled women). She said, ‘families of girls with disabilities get them sterilised because they pred…		‘I think it is mostly due to the negative attitude attached to people with disability. Most people do not respect us as people who deserve to be treated with dignity, when something happens to a disabled person, it is not taken as seriously compared to when something happens to a non-disabled person. This is not only by the community, even the police, the hospitals, the schools, the churches, par…	They only received support from their mothers, a head teacher and the local disabled persons’ organisation. The people of Uganda and Kenya are largely ignorant of the legislation which exists to protect them. They are not aware of their rights and are, for the most part, oblivious to the existence of relevant laws and international conventions					0	0	0	0	0	0	0	1	0	0	0	0	0	0	0	0	0	0	0	0	0	1	0
9	row 14	Ambikile	Challenges of caring for children with mental disorders: Experiences and views of caregivers attending the outpatient clinic at Muhimbili National Hospital, Dar es Salaam - Tanzania	2011	Dimension 2	Academic (Journal article)	Views of care givers on their care for mental disabled children	The purpose of this study was to explore the psychological and emotional, social, and economic challenges that parents or guardians experience when caring for mentally ill children and what they do to address or deal with them	Qualitative interviews & focus groups	High trustworthiness; medium relevance	Tanzania (urban)	Stated as poor, but no further information provided.	Unclear	Access to psychatric clinic	Parents of children with mental disability/illness	Mental disorders that pose a significant concern include learning disorders, hyperkinetic disorders (ADHD), depression, psychosis, pervasive development disorders, attachment disorders, anxiety disorders, conduct disorder, substance abuse and eating disorders.	Social stigma and discrimination	Mental disability not regarded as a proper disability	“It is very true, it’s a problem, there is a problem because the way he is you can clearly see that he completely does not fit in the community. His actions are different and, of course, not accepted by other people. You may decide to go with him to some place, for example if you look at the appearance of my own child you may think he is just okay. But his actions are so disgusting (kukera) that …	Social isolation; carers don’t want to go into public with the child anymore.	A number of respondents revealed having disturbing thoughts about living with a mentally ill child. They expressed being stressed by the explicit behaviour of the child that caused problems not only for the parent but also to people nearby such as neighbours. Parents were also disturbed by the complexity of caring responsibilities that demanded a lot of work and being available most of time to me…	Professional assistance, public awareness of mental illnesses in children, social support by the government, private sector, and non-governmental organizations (NGOs) Measures to address challenges Parents expressed various ways they used in order to address the challenges they were facing by living with a mentally ill child. A variety of coping mechanisms were employed in different situations de…					0	0	0	1	0	0	0	0	0	0	0	0	1	1	0	0	0	0	0	0	0	0	0
10	row 15	Mwalinga	STUDY ON REPRODUCTIVE HEALTH AND HIV/AIDS AMONG PERSONS WITH DISABILITIES IN KAMPALA, KATAKWI AND RAKAI DISTRICTS	2003	Dimension 3	Grey literature (Advocay report)	Disability and HIV and abuse	The general objective of the study was to establish the reproductive health needs of disabled persons	Quantitative & qualitative survey; in-depths interviews; focus group	High trustworthiness; moderate relevance	Uganda (rural & urban)	Various indicators show poverty	Unclear	Varies, no electcity in rural areas. Some access to education. “Our parents feel we cannot perform well in school because we are disabled….they therefore, always say that they don’t have money to waste on us” (Female youth, Katakwi District). “Those who are crippled and weak cannot do anything to earn some money. Parents have to provide for them throughout their life and most parents are also poo…	PWDs	Results indicate that the blind, and the deaf and dumb are very vulnerable to forced sex and rape. The former cannot identify the victims particularly strangers while the latter cannot effectively communicate and thus find it hard to obtain protection when faced with such situations	“Our parents feel we cannot perform well in school because we are disabled….they therefore, always say that they don’t have money to waste on us” (Female youth, Katakwi District) “My parents wanted me to attend school but in all the schools I went, the teachers could not understand my problem (she is deaf)”, another one adds “I could not climb the stairs of the schools they took me to and I stopp…		Poverty, discrimination, and stigma, are the major socio-economic problems faced by persons with disabilities. The reproductive health problems faced by women with disabilities include sexual exploitation, unwanted pregnancy and complications during childbirth Rape. Results indicate that the blind, and the deaf and dumb are very vulnerable to forced sex and rape. The former cannot identify the vi…		Exclusion from the reproductive health sensitisation and awareness raising programmes was cited as a major problem by either sex. More men (22%) than women (16%) have ever engaged in sex for gain. The high levels of poverty pre-dispose them to HIV/AIDS in that women have to engage in sexual activities with multiple sexual partners in anticipation of financial and other forms of support “We want g…	. Facilitating all PWD councillors with transport to enable them reach all the groups of PWDs in their areas of operation. b. Organise RH seminars specifically targeting disabled persons given their unique problems with communication. c. Support PWDs drama groups so that they disseminate RH and HIV/AIDS information among PWDs. Such support could include equipment and script development for unifor…					0	1	1	0	0	0	0	0	0	0	0	0	0	0	0	0	0	0	0	0	0	0	0
11	row 19	Bannink et al.	Community Knowledge, Beliefs, Attitudes, and Practices towards Children with Spina Bifida and Hydrocephalus in Uganda	2015	Dimension 2	Academic (Journal article)	Community beliefs, knowledge, practices and attitudes around neurological disorders in Uganda	This article describes the findings of a qualitative study on knowledge, beliefs, attitudes, and practices towards children with spina bifida and hydrocephalus in four regions of Uganda. This study describes how negative knowledge, beliefs, attitudes, and practices create bar- riers to treatment and inclusion of children with spina bifida and hydrocephalus and their parents in Uganda. It shows ho…	Qualitative, semi-strucured interviews, focus groups and observations	High trustworthiness; moderate relevance	Uganda (rural & urban)	not specified	In our study, negative gender attitudes and practices towards mothers of children with spina bifida and hydrocephalus were observed. In various cases the mother was blamed for giving birth to a child with a disability and was abandoned by her husband and/or mistreated by her in-laws.	In Uganda, neurosurgery for spina bifida and hydrocephalus is offered in the national referral hospital in the capital city Kampala in central Uganda, and in a specialised neurosurgical children’s hospital in eastern Uganda. Specialised rehabilitation services including physiotherapy, occupational therapy, and social support through parent support groups and counselling are offered in four locati…	178 Parents of children with spina bifida and/or hydrocephalus aged 4-14	spina bifida and/or hydrocephalus (66% of children with spina bifida also develop hydrocephalus)	The most common community beliefs were that the defects are caused by witchcraft and curses, bad luck, use of family planning methods, divine intervention, and genetic prob- lems in the family, which are believed to affect the baby before birth. A few believe the impairments are caused by intense physical exercise during pregnancy, and contact with sacrificial places before birth. The few respond…	Referral for appropriate treatment appears a big challenge for most parents, as knowledge is limited and health workers may equally be ignorant: Community attitudes have changed over time in some areas when community members have seen children recover from surgery and progress with rehabilitation and parental care. Initially, children with spina bifida and hydrocephalus are seen as children who a…	Exclude children and parents from community life (complain of smell/incontinence) Take child to the witch doctor or traditional healers for ceremonies to undo the curse Neglect the child Hide child in the villages Lock child in the house or on chain when parent needs to go out Throw the child in the river (northern region only) Referral to healthcare and rehabilitation only if known and encourage…	isolation and children don't want to play with them; Out of shame, children are hidden in the houses and locked up when parents need to go out to dig or to the market; As children are believed to be “dead”, life-giving practices such as breastfeeding are discouraged by community members; The related practice in the northern region is to bring the child to the river. The child is tied on the back …	Geographic location - the difference in attitudes is based on the fear of contamination in the north, and beliefs that the parent and communities should be “relieved” from the burden as the child will not contribute to the household; something which is absent in the other areas. In all regions, parents are encouraged to take their child to the witchdoctor for rituals to “undo” the curse, and ther…	Nevertheless, in each region there were one or two parents who mentioned that the child was seen as a human being with divine powers, and is treated with great respect. Table 3 presents the different local words used to describe children with disabilities and spina bifida and hydrocephalus across the four regions, derived from interviews and observations. The majority of parents express that the …	We argue that when studying knowledge, attitudes, and practices, evolution needs to be added. Longitudinal studies measuring attitudes and practices at different points in time, with exposure to a child with spina bifida and/or hydrocephalus, will give a more realistic and enabling description of inclusion in the society. In non-longitudinal studies, researchers can systematically ask about evolu…				0	0	0	0	0	1	1	0	0	0	1	0	0	1	1	0	1	1	1	1	0	0	1
12	row 21	Miles	Including Deaf Children in Primary Schools in Bushenyi, Uganda_a community-based initiative	2011	Dimension 4	Academic (Journal article)	Educational inclusion of deaf and disabled children; protective factors for inclusion of disabled and deaf children	In this article we explore the particular challenge of including deaf children in government primary schools in Bushenyi district in Uganda, east Africa, drawing heavily upon the evaluation of an inclusive education programme, commissioned and funded by Deaf Child Worldwide and carried out by the first author, a Deaf consultant from the UK. We review the mechanisms in place to support deaf childr…	The paper is not really a study- it draws on a separate evaluation of a school intervention programme	low trustworthiness; low relevance	Uganda (rura)l	Lower socio-economic (but not explicitly specified)	not specified	Although the data on out of school disabled children are unreliable, they at least provide an indication of the scale of the crisis. In Rwanda, for example, a recent study revealed that, of an estimated 10 000 deaf children, just 300 (three per cent) were enrolled, almost exclusively in special schools.8 In a rare study of special schools in Uganda, Kristensen et al found a disturbing lack of spe…	N=123 deaf children (and teachers and parents? However, these are the people	Deafness	Only reports on positive attitudes of teachers / schools who decide to include deaf children; "The report demonstrated that deaf children, in particular, were not being included in their local schools despite progressive national policies, and that negative family and community attitudes were a major barrier to their potential inclusion." no further details provided	n.a.	Exclusion from Education	No education		Family and community attitudes being positive; The Ugandan government began developing equitable and progressive education policies which prioritise girls, children from income-poor families and disabled children in 1997.	Integration in school through inclusive financing of teachers; parent invovlement; teacher education	School intervention in a Ugandan School to include teachers; the District began implementing a primary-level inclusive education programme in 2004, which initially focused on in-service training for teachers and the creation of five units for deaf children, as well as some units for children with learning difficulties. Existing primary school teachers volunteered to receive on-the-job training in…		The needs analysis and sensitisation programme conducted by VSO Uganda contributed to feelings of local ownership and increased awareness of the benefits of education for deaf children. The unit teachers encouraged the parents to start meeting regularly to learn Sign Language. Many of the parents, who are now so supportive of the programme, had initially been sceptical, doubting the value of educ…	0	0	1	0	0	0	0	0	0	0	0	0	0	0	0	0	0	0	0	0	0	0	0
13	row 23	ACPF	Children with disabilities in Ethiopia - the hidden reality	2011	Dimension 1	Grey literature (Advocay report)	Realities in the different aspects of life faced by disabled children in Ethiopia	The multiple-country study is an effort to make the situation of children with disabilities more visible, so that parents, community leaders, policy makers, as well as child rights activists and their organisations, commit themselves to better protecting and promoting the rights of children with disabilities. The study seeks to analyse how cultural, social, physical and other societal barriers pr…	The research design included both qualitative and quantitative data collection methods, so as to document the complete situation faced by respondents. Snowball sampling was necessary as a consequence of the unavailability of disability prevalence data, but meant that children were identified primarily through non- governmental organisations (NGOs) and local government offices, increasing their li…	Moderate trustworthiness; high relevance	Ethiopia (rural & urban)	Mixed - most children were from conventional setting, a smaller part from institution and the smallest part children living on the street.	49.8% male, 50.3% female	HOUSE ADAPTATION: Only 13% of carers stated that their houses had been physically adapted to assist the disabled child under their care. Of these, 82% were carers in conventional settings, and 18% were in institutional settings. Of those children whose housing had been physically adapted, 23% were physically impaired; 15% visually impaired; 25% hearing impaired; 28% intellectually impaired; and 8…	The study identified children aged 9-17 with hearing, intellectual, physical, visual and multiple disabilities in both rural and urban settings; and conventional (household) and unconventional (in institutions or on the street) environments. Seventy-one per cent of respondents to the carer questionnaire (the child’s primary carer) were female. However, even though most of the respondents are fema…	Hearing, intellectual, physical, visual and multiple disabilities As we discussed in 4.1.2, 35% of the child respondents were born with a disability. Many of these may have been the result of malnutrition or under-nutrition, prenatal diseases among the mothers or poor sanitary conditions. This indicates that a lack of basic health care services and low standards of living could be linked to the p…	According to carers, 35% of the children in the study had been born disabled, 38% had been disabled through illness, 10% through an accident, 1% through violence, less than 1% through hereditary causes, 2% through other means (stated as God’s curse, punishment of sins and evil spirits) and 14% for unknown reasons. A lack of accurate documentation on childbirth and the onset of disability hinders …	The trend is predominantly consistent across all disability types, except for visual disability: 12% of children with a visual impairment had been born disabled, while 60% – a much larger than total sample average – had been disabled through illness. This is reflective of the large incidence of preventable visual disability in Ethiopia as a consequence of trachoma. glaucoma and other infectious d…	violence (according to carers, in 1% the disability was caused through violence); The quantitative and qualitative tools produced conflicting evidence on community participation, making it clear that some communities are more inclusive than others. A sizable minority of child respondents stated that they had been verbally or physically abused by other community members (both adults and children),…		In contrast, a community leader from Mekele, which does not have a large disability network, stated that in his community, “disability is still regarded as a curse, and anyone who gives birth to a disabled child is automatically discarded from the community”.	Attitudinal barriers usually arise from negative societal beliefs about the worth of children with disabilities. This study however revealed, through focus group discussions and interviews with community leaders, that the presence of an active disability-inclusive NGO or DPO in the locality led to a major difference in attitude towards disabled children. Where there was NGO support, leaders repor…	EDUCATION: The government must ensure there is sufficient budget for the SNE strategy; There must be more efforts to teach sign language to children with hearing impairments, their teachers and families; _x0000_ There must be more positive reinforcement for disabled children in school: Seventeen per cent of the child respondents were involved in paid work; There must be more education for carers …				0	0	0	0	0	0	0	1	0	0	0	0	1	0	0	1	0	0	0	0	0	0	0
14	row 26	Mukuria & Korir	Education for Children With Emotional and Behavioral Disorders in Kenya_Problems and Prospects	2006	Dimension 4	Academic (Journal article)	Disparity in educational services in Kenya for children with disabilities.	In this article, we provide an overview of special education in Kenya and address several issues relevant to the status of spe- cial education services. These issues include the (a) prevalent cultural attitudes toward individuals with special needs, (b) plight of individuals with emotional and behavioral problems, and (c) identifica- tion, assessment, categorization, and placement procedures.	literature and policy document review	Low trustworthiness; high relevance	Kenya (rural & urban)	n.a.	n.a.	Limited access to schools and education for children with emotional and behavioural disorders. According to Gichura (1999), in the late 1990s, there were 107 special schools in Kenya. Of these, 31 were for those with auditory impairments, 46 were for the mentally challenged, 13 were for those with physical handicaps, 16 were for students with visual impairments, and 1 was for the deaf–blind popul…	Children and students	Emotional and behavioural disorders	Emotional and behavioural disorders understood as curse from God - referred to secondary studies	Reported as limited	language (Swahili word for death); stigma;		The definition of behavioral and emo- tional disorders is culturally specific (Kauffman, 2005), and a general consen- sus on the definition has not been reached. Different ethnic groups in Kenya perceive emotional and behavioral problems differently. Type of disability may be a risk factor with regard to being excluded from education -- e.g. lack of trained signlanguage teachers means that many d…						0	0	0	1	0	0	0	0	0	0	0	0	0	0	0	0	0	0	0	0	0	0	0
15	row 28	ACPF	Children with disabilities in Uganda - the hidden reality	2011	Dimension 1	Grey literature (Advocay report)	Realities in the different aspects of life faced by disabled children in Uganda	The purpose of the study was to document the realities faced by disabled children in the different aspects of their lives at all levels: household, community, school and workplace. The study also aimed to find out how accessible key services – such as education, health and social – were to disabled children and their families, and how much emotional and financial support they received.	Both qualitative and quantitative methods were used. The quantitative method used two sets of structured questionnaires: child questionnaire and a carer questionnaire. The qualitative methods included: key informant interviews, focus group discussions and a Day in the life exercise.	High trustworthiness; high relevance	Uganda (urban & rural)	To ensure national representation, disabled children living both in conventional settings (with their family) and in unconventional settings (on the streets, in boarding schools or in rehabilitation centres/institutions)	gender balance aspired but could not be fully realized	This study has a lot of detailed information on accessibility to services; it concludes that the government and NGOs are very detached from disabled children and do not provide the support that is expected of them. Although disability-focused organisations and DPOs are many in number, they are not making a huge impact on the lives of disabled children; their presence is barely felt by the childre…	This study involved 540 children aged 9-17 with a physical, visual, hearing, intellectual or developmental impairment, or a combination of these selected randomly from different districts of Uganda. It included children with attention disorders, learning difficulties, speech impairment and autism.	Disability - defined as intellectual, hearing, visual, physical, excluding albinism	The study revealed that public awareness about disability issues has since the mid-1990s increased, and there is evidence of improvements in attitudes and practices among family members and communities. The majority of respondents – both carers and children – were aware of the rights of disabled children. In addition, and partly as a result of this increased awareness, attitudes and practices tow…		The study revealed that disabled children encounter physical and emotional abuse inside and outside home, in the community and at workplace. The study revealed that disabled children still face non-supportive attitudes and practices at both family and wider community levels. Within the family, 32% of child respondents were excluded from gatherings and social events; 35% were verbally or physicall…		The study seeks to analyse how cultural, social, physical and other societal barriers prevent children with disabilities from enjoying their constitutional rights to equality, freedom and human dignity.		There is need for stakeholders to improve on the available data to aid programming. The upcoming housing and population census (2012) provides an opportunity to collect significant and reliable data on disabled persons and hence sufficient preparations need to be made. _x0000__x0000_ Several actors, especially within the disability fraternity, need to step up their advocacy and lobbying for the i…				0	0	0	0	0	0	0	1	0	0	0	0	1	0	0	0	0	0	0	0	0	0	0
16	row 29	Buchmann	‘These nodding people’: Experiences of having a child with nodding syndrome in postconflict Northern Uganda	2015	Dimension 2	Academic (Journal article)	Experiences of interacting with children with nodding syndrom	Nodding syndrome, an epidemic epileptic encephalopathy of unknown etiology, has affected an estimated 1834 children in Northern Uganda. Children are being treated symptomatically but inconsistently with antiepileptic drugs.	Ten semistructured interviews with caregivers of affected children and five focus group discussions with 23 relatives, teachers, and religious leaders were conducted to examine the experiences of affected families and communities in Kitgum and Pader districts.	High trustworthiness; high relevance	Uganda (rural)				Ten semistructured interviews with caregivers of affected children and five focus group discussions with 23 relatives, teachers, and religious leaders were conducted to examine the experiences of affected families and communities in Kitgum and Pader districts.	Nodding syndrom	Nodding syndrome severely affects the children's ability to participate in daily life activities. Daily seizures and physical features such as salivating and stunting make them unable to pass as normal, and mood changes make it difficult for some to interact with others. Caregivers of children with nodding syndrome feel confined to their homes, and economic activities are reduced, which affects e…		Stigma; exclusion from other activities; ostracism; separation; non-acceptance; neglect	Death, violent attacks, exclusion from society; The fact that a participant in this study narrated that his mother sometimes threatens to throw her three affected children in the river indicates the depth of hopelessness and depression.	Disruption of education; PTSD / war trauma of carers; Helplessness was also a reflection of actual powerlessness; parents have no capacity to act, and there is no one to call upon for support. Not having options to act in a situation to get help or information or be heard increases a sense and a lived experience of helplessness; Healthy siblings have also had their education compromised by noddin…		A consistent supply of antiepileptic medication is likely to reduce the stigma and fear of transmis- sion, as the affected children's acceptance among others was greatly compromised whenever they had seizures. The loss and suffering involved with nodding syndrome are seen as a continuation of the confinement and trauma once caused by war, and a good regimen of medication is not the whole answer.				0	0	0	0	1	0	0	0	0	0	0	0	0	0	0	0	0	0	0	1	0	0	0
17	row 32	Ingstad & Grut	See me, and do not forget me People with disabilities in Kenya	2007	Dimension 5 - I think this should actually be a dimension 1 study	Grey literature (Advocay report)	disability and poverty in Kenya	This report is a contribution towards describing the lives of people with disabilities in Kenya. The report presents results from two field works conducted during two weeks of May/June 2005 and two weeks of October 2006. The work was done on behalf of the World Bank.	qualitative study with interviews and focus groups, consisting of two fieldwork periods (referred to in text as 'studies'). The 2005 study comprised in all 42 interviews and conversations that gave relevant information to the study: Secondary information: 11 Group interviews: 4 Individual interviews: 27 In all (2005): 42 The 2006 study comprised in all 49 interviews, including a group interview a…	Low trustworthiness; high relevance	Kenya (urban & rura)l		aim to balance		The 2005 study comprised in all 42 interviews and conversations that gave relevant information to the study: Secondary information: 11 Group interviews: 4 Individual interviews: 27 In all (2005): 42 The 2006 study comprised in all 49 interviews, including a group interview at the Social Development Office in Kisii: Men 19 Women 13 Children 16 Round table conversation 1 In all (2006) 49 For the 20…	disabilities of various kinds	Traditional beliefs however do not always make life for disabled people easier. We were told many times by the people that accompanied us and facilitated the field work that ‘people around here think that disabilities are a curse’ but we did not meet anyone who said so about their own situation. Some said that their parents had thought the impairment was due to witchcraft, a belief which may refl…		extreme neglect, abuse; forced in to criminality; violence; being married off as a disabled woman and treated badly by husband's family; rape	wounds and deteriorated situation of child	The vulnerability of th eindependent individual; Lack of adapted services and counselling; A final point to be made on how poverty influences disability is that some poor families seem to have lost what we may call a “fighting spirit” and they seem to have given up. Faced with the many losses and obstacles that poverty creates, the care for a disabled family member is one burden too many and just…	Having a male person in the house; The most important resilience factors we saw during the fieldwork were: 􏰀 Family and neighbourhood support 􏰀 Education 􏰀 Employment and/or farmland 􏰀 Religion 􏰀 Support by representatives of DPOs 􏰀 Luck					0	0	0	0	0	0	0	1	0	0	0	0	0	0	0	0	1	0	0	1	0	0	0
18	row 33	ACPF	Breaking the Silence_Violence against Children with Disabilities in Africa	2010	Dimension 1	Grey literature (Advocay report)	Violence against disabled children in Africa	The remarkable prevalence of violence against children with disabilities is the report’s most striking finding.	Key informant interviews and focus group discussions were held with relevant stakeholders in the five study countries. These included parents and carers of children with disabilities, individuals from disability and child-focused Organisations, teachers, law enforcers and ministers.	High trustworthiness; high relevance	Uganda (rural & urban)				A majority (65%) of respondents had acquired their disabilities through illness; 17% before or during birth; 11% through an accident; 5% through other means; and 2% through violence. Given the predominance of illness as a cause of disability, further research is essential into disabling diseases that are still rife in Africa – such as polio, malaria, leprosy and measles – and continue to disable …				The survey investigated seven types of physical violence against children, including: • hitting, punching, kicking or beating • locking them in a small room or tying them with rope or chains • putting hot chilli or bitter food or drink in a their mouth • choking, burning or stabbing • denying food for an extended period of time • forcing them to carry out hard or difficult work for the benefit of…	No repercussions; required medical attention; had to miss school or work; had to stay in the house; permanently handicapped;	Sexual abuse: Between them, respondents from all the countries identified 3,851 perpetrators of sexual violence, which equates to 1.4 perpetrators per reported incident of sexual violence. Unrelated children and adult neighbors each accounted for 25% of sexual violence against respondents, but worryingly, boyfriends (13%), teachers (6%), other relatives (6%) and strangers (5%) were all reported w…		We recommend that governments, civil society and the international community work in partnership in fulfilling the human right of children with disabilities on an equal basis with other children through: Supporting the training for carers of children with disabilities; availing education services for and about children with disabilities; Enable governments to live up to their responsibilities to …				0	0	0	0	0	0	0	1	0	0	0	0	1	1	1	1	0	1	0	0	0	0	1
19	row 38	Gona et al.	Caring for children with disabilities in Kilifi, Kenya: what is the carer’s experience?	2010	Dimension 2	Academic (Journal article)	Stigmatisation of carers of disabled children	Carers of children with disabilities have repeatedly highlighted their feelings of discrimination, stigma and exclusion in many domains of their lives. There is little research from Africa addressing these issues. This study investigated the challenges encountered by these carers and the mechanisms of coping with these challenges while caring for children with disabilities in a poor rural setting…	Thirty-five in-depth interviews were conducted with 20 carers, 10 community members and 5 primary school teachers. Ten unstructured observations were also conducted in home environments to observe mechanisms used in meeting the needs of the children with disabilities. All interviews were tape-recorded, transcribed and translated from the local dialect. Note-taking was performed during all the obs…	High trustworthiness; moderate relevance	Kenya (rural)	low socio-economic				Disabilities in general	The arrival of a disabled child severely impairs the expectations of carers. Hospital staff underestimate carers’ emotional distress and need for information. Fear for the future, stress, rumour-mongering and poverty are encountered by carers. As they grapple with lost expectations, carers develop positive adaptations in the form of learning new skills, looking for external support and in some ca…		Speculation about the child’s disability among community members could possible result from lack of proper information on what causes a disability. As previous studies in Kilifi have found that disability is associated with evil spirits, punishment from God or witchcraft, this could possible explain the aspect of people spreading rumours. Carers expressed feelings of guilt about their child’s dis…			Finally the data indicate that carers adapt different mecha- nisms to cope with the antagonizing forces because of the dis- abled child. Participants said that when carers found themselves in a state of helplessness, they engaged in spiritual beliefs. Hope and spiritual beliefs are important factors in people’s ability to meet life challenges. They have been found to be important protective facto…					0	0	0	0	0	0	0	1	0	0	0	0	0	0	0	0	0	0	0	0	0	0	0
20	row 40	Kisanji	Attitudes and Beliefs about Disability in Tanzania	1995	Dimension 5	Book chapter	Analysis of Tanzanian proverbs, sayings, riddles, folksongs and tales which carry notions related to disability	An examination of 78 proverbial sayings collected through interviews and from published books indicated that personal characteristics of persons with sensory and physical impairments as well as those with severe intellectual impairments were well known.	Proverbs, sayings, riddles, folksongs and tales which carry notions related to disability and disabled people were collected by the author using documentation and interviews. A literature search for the period 1935-1990 was carried out. Interviews were also conducted with tribal elders (N=44), primary school heads (N=10) and teachers (N=45). The data obtained was then analysed thematically by dis…	Low trustworthiness; moderate relevance	Tanzania (rural & urban)					disabilities of various kinds; in Tanzanian culture includes body shape and "ugliness", which are seen as disabling factors	There is evidence from the proverbs collected that the Tanzanian culture places more value on some parts of the body, or a combination of them, than others. Damage or loss of those parts held dear by the community determines the definition and severity of disability. The following proverbs provide examples of this notion. These proverbs provide evidence of the culture's understanding of both the …	The proverbs indicate that most tribal communities in Tanzania have a good knowledge base about the personal characteristics of disabled persons. This is expected in view of the fact that disability exists in the community and that disabled and non-disabled people come in contact with one another in the home and the community. Disabled persons are both parents and children, members of families. I…	Some of the proverbs can be used in a negative way	contribution to stigmatisation	proverbs and sayings as traditional "community knowleged" passed down can be seen as perpetuating the stigma around disability	The author interprets some of the proverbs as positive and inclusive, and hence says they convery a positive attitude to disability. I'm not sure I personally agree	Training frontline workers to be aware of the proverbs and how they embed and perpetuate certain cultural/traditional beliefs				0	0	0	0	0	0	0	1	0	0	0	0	0	0	0	0	0	0	0	0	0	0	0
21	row 41	ACPF	The African Report on Children with Disabilities	2014	Dimension 1	Grey literature (Advocay report)	Disability issues for children across Africa	Study illustrates the challenges and hurdles for disabled children in all of Africa. Quotes findings of some of the ACPF studies that we already mentioned earlier on	This report is the result of a desk based analysis and synthesis of various sources on children with disabilities in Africa, which include the following: A pan-African overview of the challenges and opportunities facing children with disabilities in various sectors Surveys on the lives of children with disabilities in Ethiopia, Senegal, South Africa and Uganda Surveys on the education of children…	High trustworthiness; high relevance	Ethiopia and Uganda						In Tanzania there are widespread accounts of people and children with albinism being abducted and killed due to the ‘superstitious belief’ that utilizing their body parts ‘will lead to great wealth’. Witchcraft ￼Subjected to harmful “treatments”, threats to life ￼ Possession by demons Subjected to harmful practices for “cure”, tied to trees, ritual killings ￼ Highly contagious ￼Exclusion from com…		Children with disabilities not registered at birth; Many countries in Africa have low registration rates for children with disabilities. For example, only 28.5 per cent of children with disabilities in Ethiopia and 48.7 per cent of children with disabilities in Uganda29 are registered at birth. In Tanzania there are widespread accounts of people and children with albinism being abducted and kille…	no access to education and social interaction compared to their siblings							0	0	0	0	0	0	0	1	1	1	0	0	0	0	1	0	0	0	0	0	0	0	0
22	row 45	Boersma	Protecting Children with Disabilities from Violence in CBR Projects_Why We Need to Work with a Different Form of Child Protection Policy for Children with Disabilities	2013	Dimension 1	Academic (Journal article)	Breaking the cycle of violence regarding children with disability in Ethiopia through community based rehabilitation	Children with disabilities encounter more violence in their lives than their peers without disability. Organisations involved in Community Based Rehabilitation (CBR) come across many cases of violence against the children they work with. Many organisations have no policy on child protection since it is not within the scope of their expertise. Others work with child protection policies that are ha…	Reporting on previous studies	Low trustworthiness; high relevance	Ethiopia (rural & urban)			Often, child protection policies are of little use to the CBR projects in developing countries, due to lack of professional resources and low awareness about the possibilities and need to protect children with disabilities from violence.		disability in general											0	0	0	0	0	0	0	1	0	0	0	0	0	0	0	0	0	1	0	0	0	0	0
23	row 46	Gona et al.	Parents’ and Professionals’ Perceptions on Causes and Treatment Options for Autism Spectrum Disorders (ASD) in a Multicultural Context on the Kenyan Coast	2015	Dimension 5	Academic (Journal article)	To explore parents’ and professionals’ perceived causes and treatment of Autism Spectrum Disorders (ASD) on the Kenyan Coast.	To explore parents’ and professionals’ perceived causes and treatment of Autism Spectrum Disorders (ASD) on the Kenyan Coast. These findings present the views of parents and professionals from diverse-cultural settings on perceived causes and treatment options of ASD. Despite cSultural differences, participants expressed opinions with important similarities. Perceived causes of ASD were of two ty…	This study utilized a qualitative design and applied a phenomenological methodology guided by the “Explanatory Model” framework as described by Kleinman et al. [12]. This model explains the beliefs one holds about an illness or disorder, the personal and social meaning attached to the disorder and expectations about what will happen. In-depth interviews and FGD were the data collection methods. T…	High trustworthiness; lowrelevance	Kenya (rural)				Study participants included in this study were parents of children with a presumptive diagnosis of ASD and professionals. A total of 103 participants took part in this study, 60 from Kilifi County and 43 from Mombasa County.		Findings from this study demonstrate that people from diverse cultural backgrounds on the Kenyan Coast have similar beliefs around perceived causes of ASD. The insights gained from this study can be used to develop intervention programmes aimed at creating awareness on ASD, and encouraging optimal health seeking behavior among parents of children with ASD and other neurodevelopmental disorders. P…						Cultural values influence diagnosis, treatment and the welfare of families with an ASD child [26]. In keeping with studies on epilepsy, and other conditions, it seems like the populations at the Kenyan coast maintain pluralistic beliefs of autism with supernatural and biomedical causes. These results have important implications for setting up treatment and intervention services for children with …				0	0	0	1	0	0	0	0	0	0	0	0	0	0	0	0	0	0	0	0	0	0	0
24	row 48	Rwiza et al.	Knowledge, Attitude, and Practice Toward Epilepsy Among Rural Tanzanian Residents	1993	Dimension 5	Academic (Journal article)	Attitutudes towards epilepsy in Tanzania	Before a health education program can be es- tablished, one must first know what the target population believes and does with respect to the disease in question. Therefore, we performed a study among Tanzanian rural inhabitants to identify their knowledge, attitude, and practice (KAP) toward epilepsy.	Subjects for interview were identified during a community-based epilepsy survey made in Ulanga district (2,953 subjects) and during a community survey of noncommunicable diseases in Musoma on the eastern shore of Lake Victoria (302 subjects). An open questionnaire with 12 questions consid- ered important in a rural setting (Table 2) was used. The interviewers (fourth-year medical students) had un…	High trustworthiness; high relevance	Tanzania (rural)				3,256 heads of house- holds (mean age 40.2 years, range 15-90 years; MIF ratio 1:l) were interviewed. Of the respondents, 32.9% said they had never seen a seizure; 67.7% said they did not know the cause of epilepsy; 33.3% mentioned various causes including heredity, witchcraft, infection of the spi- nal cord, hernia; 40.6% believed epilepsy was infectious through physical contact, flatus, breath,…	Epilepsy and related conditions	Of the 2,962 responders, 40.6% believed epilepsy TABLE 3. Factors associated by rural Tanzanian residents with the belief that epilepsy is an infectious diseuse was infectious and 33.5% believed it was not; 25.7% did not know the answer. Of the 1,202 who said epilepsy was infectious, 39.6% said it was transmit- ted through flatus, 23.6% mentioned eating together or sharing utensils, and 24.4% men…		Stigmatisation; lack of access to health care; not allowed to go to school		Of the 3,254 responders, 76.6% mentioned falling in dangerous places (water, fire) to be the major risk of having epilepsy. Other mentioned risks were mental subnormality (18.4%), insanity (5.2%), and death (17.3%). Fifteen percent said they did not know the risks associated with having epilepsy. Of those who had not seen a seizure, 29.1% said they did not know the risks, whereas only 6.5% of tho…						0	0	0	0	0	1	0	0	0	0	0	0	0	0	0	0	0	0	0	0	0	0	0
25	row 49	Devries et al.	Violence against primary school children with disabilities in Uganda: a cross-sectional study	2014	Dimension 1	Academic (Journal article)	Vioence against children with disabilities in Uganda	150 million children live with disabilities globally, and a recent systematic review found 3 to 4 times the levels of violence versus non-disabled children in high income countries. However, almost nothing is known about violence against disabled children in lower income countries. We aim to explore the prevalence, patterns and risk factors for physical, sexual and emotional violence among disabl…	150 million children live with disabilities globally, and a recent systematic review found 3 to 4 times the levels of violence versus non-disabled children in high income countries. However, almost nothing is known about violence against disabled children in lower income countries. We aim to explore the prevalence, patterns and risk factors for physical, sexual and emotional violence among disabl…	High trustworthiness; high relevance	Uganda (rural)										Schools are a main risk environment, but also provide an opportunity to deliver interventions to reduce violence. Further research is needed to understand the patterns and potential to prevent violence against chil- dren with disabilities inside and outside of school in low income countries, particularly sexual violence against girls.						0	0	0	0	0	0	0	1	0	0	0	0	1	0	0	0	0	0	0	1	0	0	0
26	row 52	Stone-MacDonald 2012	Cultural Beliefs about Disability in Practice: Experiences at a Special School in Tanzania	2012	Dimension 5	Academic (Journal article)	intervention for disabled children - schooling	This article examines the results of two research questions of the full study: (1) What are the local funds of knowledge and beliefs about disability and the role of people with disabilities in the community in Lushoto, Tanzania? (2) How do the interactions between Irente Rainbow School and the Lushoto com- munity illustrate beliefs about disability in this community?	Thirty-two formal interviews were conducted with families, school staff, and local leaders in Swahili. Informal discussions were held with teachers and families. To ensure the validity of the data, the author used five strategies outlined by McMillan and Schumacher (2006): prolonged time in the field; in-depth interviews; triangulation of interviews, observation, and documents; member checks; and…	High trustworthiness; high relevance	Tanzania (rural)	low	mixed	study is an intervention, hence the guardians of disabled children and teachers interviewed do have access to a school, but not necessarily to medical care	school had 30 individuals aged 6–25, with developmental disabilities including intellectual disabilities, autism, hydrocephalus and cerebral palsy.	including intellectual disabilities, autism, hydrocephalus and cerebral palsy.	In Lushoto, the medical model, the rehabilitation model, and the pluralistic model were all apparent in the beliefs of local stakeholders. Community members’ beliefs about disability were present in this community and in their interactions. Through observations and interviews, the author found that com- munity members’ beliefs varied. Several of the participants stated that they had heard about p…		Hidding of children			Not going to school, missing out on social interaction		Since the Rainbow School started and the outreach programme began, the school and the church have been looking for all the children who have been hidden at home to provide them with some level of service. If possible, the outreach staff try to get the children placed at Rainbow, in an outreach volunteer classroom, or in a primary school based on the child’s needs and where the family lives. In th…			0	0	0	0	0	0	0	1	0	0	0	0	0	1	0	0	0	1	1	0	0	0	0
27	row 53	Save the Children	Out from the shadows: sexual violence against children with disabilities	2011	Dimension 1	Grey literature (Advocay report)	Disability and sexual abuse in Mozambique, Madagascar, Zanzibar, and Burundi	This report sheds a light on a shocking issue that contravenes every aspect of human and child rights. This report seeks to change this. It seeks to make this issue more visible and to challenge governments and communities, including the international community, to tackle it head on	Qualitative, semi-strucured interviews.	Low trustworthiness; high relevance	Mozambique, Madagascar, Zanzibar, Burundi	all have a low human development index and low life expectancy		in each of the four countries there is no systematic data collection on people with disabilities. in a context of social stigma towards people with disabilities and discrimination, some families do not even register the births of children with disabilities. . Very few of the survivors interviewed had completed primary school or attended secondary school – either because their parents would not se…	Adult survivors of sexual abuse; sample bias towards females	Disability (not specified)	although the consensus of all those interviewed was that sexual violence – however they defined it– against any child is wrong, many suggested that it was not seen as a serious offence, particularly against children with disabilities. some respondents even suggested that children with disabilities who had experienced sexual violence were often regarded as fortunate, especially if they fell pregna…		Sexual absue	n/a	although the consensus of all those interviewed was that sexual violence – however they defined it– against any child is wrong, many suggested that it was not seen as a serious offence, particularly against children with disabilities. some respondents even suggested that children with disabilities who had experienced sexual violence were often regarded as fortunate, especially if they fell pregna…	where support had been received it was almost always provided by the family and community, rather than by the local authorities or service-providers. in these cases, efforts usually focused on stopping the abuse from happening again. it must be noted that, in many cases, these efforts were successful and that abuse was not repeated once family and/ or community action had been taken. For example,…	Tackle the social and structural discrimination that prevent children and young people accessing services; Invest in high-quality, free services that prevent and respond to sexual violence against children and young people with disabilities, and prioritise the best interests of the individual child at all times.; Support children and young people with disabilities to play an active part in societ…				0	0	0	0	0	0	0	1	0	0	0	0	0	0	0	0	0	0	0	0	0	0	0
28	row 54	Hartley et al. 2005	How do carers of disabled children cope? The Ugandan perspective	2005	Dimension 3	Academic (Journal article)	stress and coping of carers	In Uganda, there is no documentation on how services relate to local knowledge. There is a need for increased knowledge and understanding of how family members cope with their disabled children to provide the basis for future service development.	Semi-structured interviews were conducted with 51 parents/caregivers. • How do such families cope when there are no services? • What problems do they face? • What strategies have they used to overcome these problems? • Have they been successful? • If they have a CBR programme nearby how do they think this programme can assist them? 1 What are the traditional beliefs and practices relating to chil…	High trustworthiness; moderate relevance	Uganda (rural & urban)		mixed		As CBR in Uganda is a strategy that caters for all impairment groups, the study aimed to collect data reflecting a balanced representation of five impair- ment categories (visual, hearing, physical, mental and multiple) identified from community work in the area. A purposive sample of three participants per impairment, per researcher (total 15), was the aim. In the event, there were 8 carers of c…	aimed to collect data reflecting a balanced representation of five impair- ment categories (visual, hearing, physical, mental and multiple			poverty, lack of resources; abuse through system; exhaustion and low resource levels of carers; isolation and abuse by peers; stigmatisation; rejection by parents. The observational data supported all the sub- themes with the exception of abuse by peers. This was not observed, most probably because of the presence of the researcher. Many children were staying with their grandparents or other elde…		Parents and teachers not coping; burden falling on one carer only - emtional and physical resources of that carer being limited or that carer falls away. There are many children with disabilities who are included, loved and cared for by their families.A lot of time and money is spent on seeking a cure.The extended family systems are breaking down and the main burden of caring for a disabled famil…	Appraisal; Community-based rehabilitation focusing on the entire family instead of only on the disabled child.					0	0	0	0	0	0	0	1	0	0	0	0	0	0	0	0	1	0	0	1	1	0	0
30	row 57	Stoelper 2007	Hidden Shame: Violence against children with disabilities in East Africa	2007	Dimension 1	Academic (Journal article)		Terre des Hommes has conducted an exploratory investigation into violence against children with disabilities in the East African countries of Kenya, Uganda and Tanzania. The three countries have approximately 2,85 million children with disabilities. This report confirms the high levels of violence experienced by children with disabilities.	Exploratory investigation, does not have a great deal of methodology (only one paragraph), but the questionnaire is attached etc. and the study is highly releveant	Low trustworthiness; high relevance.	Tanzania, Kenya, Uganda			Very limited	children in Tanzania, Kenya and Uganda	disability in general			Though statistics are rare, severe forms of physical and sexual abuse were found in an estimated 135,000 children with disabilities in Kenya, which is 15-20% of children with disabilities living in that country – totalling about 750.000. In particular, girls with mental disabilities are prone to be sexually violated. On top of that, the report finds that the majority of children with disabilities…								0	0	0	0	0	0	0	1	0	0	0	0	1	0	0	0	1	0	0	1	0	0	1
31	row 58	Marshall 1997	Provision for Children with Speech and Language Difficulties in Tanzania	1997	Dimension 2	Academic (Journal article)	Training and knoweldge of how to interact with children with speech and language disabilities in Tanzania	The purpose of this study was to address a number of the issues outlined above, in particular, to obtain a measure of the levels of knowledge about paediatric speech and language difficulties amongst a sample of health and education professionals in Tanzania. The study sought to determine what this group of professionals, plus a range of health and education service planners and providers, consid…		High trustworthiness; moderate relevance	Tanzania (rural & urban)					speech and language disabilties			neglect of children with speech difficulties; physical abuse				establishing the knowledge and belief base of therapists and people caring for these children as well as of service providers, so as to ensure that appropriate service can be provided to these children; the study is testing the methodology to collect data on these baseline measurements				0	0	0	1	0	0	0	0	0	0	0	0	1	0	0	0	0	0	0	1	0	0	0
32	row 60	Winkler et al. 2010	ATTITUDES TOWARDS AFRICAN TRADITIONAL MEDICINE AND CHRISTIAN SPIRITUAL HEALING REGARDING TREATMENT OF EPILEPSY IN A RURAL COMMUNITY OF NORTHERN TANZANIA	2010	Dimension 5	Academic (Journal article)	Traditional healing and Christian Prayers as treatment of Epilepsy in Tanzania	Our study demonstrates that not only THM but also prayers in the Christian sense seem to play an important role in people’s beliefs regarding successful treatment of epilepsy. Factors influencing this belief system have been identified and are discussed.	In this study, 167 people (59 PWE, 62 relatives, 46 villagers) were interviewed at the hospital and in the community with a semi-structured validated questionnaire regarding the prevailing attitude towards traditional medicine for treatment of epilepsy in a rural area of northern Tanzania.	High trustworthiness; moderate relevance	Tanzania (rural)			limited	people with epilepsy, their carers and traditional healers and people who don't have epilepsy (as control group)	Epilepsy	traditional attitudes and beliefs of		Spitting on patients as part of traditional healing, 'sacrification' (which means cutting the patient), having the patient drinking a potion to make him/her vomit								0	0	0	0	0	1	0	0	0	0	0	0	0	0	0	0	0	0	1	0	0	0	0
33	row 61	Under the same sun	Children with Albinism in Africa: Murder Mutilation and Violence - A report on Tanzania	2012	Dimension 1	Grey literature (Advocay report)	Albino Killings and Stigmatization in Tanzania	Outlining challenges for people with albinism living in Tanzania. The challenges listed entail: Skin problesm; vision problems; medical challenges; Social challenges; Educational challenges		Low trustworthiness; high relevance	Tanzania (rural & urban)	Not disclosed	Not disclosed		People with Albinism in Tanzania	Albinism (and related impairments, like visual impairment)	Cultural beliefs regarding albinism are generally myths that have out-lasted the (often inadequate and inaccessible) levels of science education in the country. Some of these myths are age-old beliefs while others are crafted relatively recently such as the myth that sexual intercourse with a female PWA can cure HIV/AIDS; Witchcraft beliefs.		Killings, Robberies, Rape; attacks; mutilation; stigmatisation; isolation  People with albinism are at risk of severe isolation because their condition is often misunderstood. ￼ Social stigmatization can occur, especially within communities where other family members and the general society generally have dark skin and appearance. Solutions o Families and schools must make an effort to include …	Death; HIV/AIDS infection; mutilation; infanticide	The use of children in muti and juju by witchdoctors is likely for the reasons that they are (1) More vulnerable, easy to find and relatively easy to capture because they are often left to play outside un-supervised, are not always cared for by their parents because they have albinism, and do not always have the strength to physically fend off attackers. (2) The use of children is also likely lin…	Knowledge about condition to make children work and study indoors; be allowed to sit in front in school;					1	0	0	0	0	0	0	0	1	1	0	1	1	1	1	0	1	1	1	0	0	0	0
34	row 62	McNally	Perceptions of caring for children with disabilities: Experiences from Moshi, Tanzania	2013	Dimension 2	Academic (Journal article)	Experiences of caregivers of CWDs	The objective of this study was to gain an insight into how having a CWD has impacted upon participants’ lives, namely, (1) if participants have experienced any negative stigma or discrimination as a result of having a disabled child; (2) if participants experience carer burden and (3) the positive experiences of caring for a CWD	Qualitative interviews & focus groups	Moderate trustworthiness; moderate relevance	Tanzania (urban)	Context of poverty	Not disclosed, but seems to be mainly females	Basic health care system in place	Carers of CWDs	Any disability			ABANDONMENT: Subjective challenges are emotional challenges and are intangible. Stigma, isolation and pity were identified. Rejection and discrimination were manifestations of stigma. Some participants spoke of rejection in general terms, ‘they all run away after knowing that I am having [sic] a disabled child …’ (C). But nearly half of all participants mentioned this specifically in relation to …		Stigma						0	0	0	0	0	0	0	1	0	0	0	0	0	0	0	0	0	0	0	0	0	0	0
35	row 63	Sebera	Addressing the treatment gap and societal impact of epilepsy in Rwanda — Results of a survey conducted in 2005 and subsequent actions	2015	Dimension 3	Academic (Journal article)	Perceptions about epilepsy & their impact on treatment	This study, supported by the Rwandan Ministry of Health and theWorld Health Organization, was conducted in 2005 to determine the prevalence of epilepsy and its sociocultural perception in Rwanda, as well as epilepsyrelated knowledge and practices of health-care professionals (HCPs)	Cross-sectional, nationally representative survey	Moderate trustworthiness; moderate relevance	Rwanda (rural & ruban)	Context of poverty	National representative survey	Basic health care system in place	National representative survey	Epilepsy											0	0	0	0	0	1	0	0	0	0	0	0	0	0	0	0	0	0	1	0	0	0	0
36	row 69	Warf	Factors affecting survival of infants with myelomeningocele in southeastern Uganda	2011	Dimension 3	Academic (Journal article)	Survival rates of infants with MM	The survival of infants treated for myelomeningocele (MM) and hydrocephalus in Uganda is unknown. This study investigated 5-year survival and the factors that influenced death in these patients.	Prevalance study based on hospital records	Moderate trustworthiness; high relevance	Uganda (rural)	Context of poverty	Not specified	Cases were treated in specialised hospital and some districts had CBR programmes	Infants with MM	myelomeningocele			MERCY KILLING; EXTREME NEGLECT. Unless the birth incidence is much lower than expected, these data suggest that, even with a neurosurgical facility close at hand offering free or very low cost care, the majority of affected infants (perhaps 75%) were not brought in for treatment. Death appeared largely unrelated to the underlying MM condition. Why, then, was the under-5 mortality rate in children…	Death		CBR programme available					0	0	0	0	0	0	1	0	0	0	1	0	0	0	0	0	0	0	0	1	0	0	1
37	row 71	Yousafzai	HIV/AIDS information and services: The situation experienced by adolescents with disabilities in Rwanda and Uganda	2005	Dimension 3	Academic (Journal article)	HIV and disability	The study had 2 aims (1) To explore whether knowledge about HIV and AIDS was similar among adolescents with disabilities compared with their non-disabled peers in Rwanda and Uganda (2) To determine factors which may increase vulnerability of disabled adolescents to HIV infection and/or inappropriate access to HIV related services in Rwanda and Uganda.	Qualitative interviews & focus groups	Moderate trustworthiness; moderate relevance	Rwanada, Uganda	Context of poverty	Mixed gender	Basic HIV information campaigns	Children with disabilities	Any disability	A disabled person going to buy a condom! It is right, but in this society, it does not look good.’’ Secondly, stigma about disability, particularly in relation to sexuality, inhibited people with disability from being open about sex and purchasing condoms.		Social Isolation: . . . for instance us who are disabled, if you feel sick nobody would take care of you. They would say that we have otherwise not been useful so we would be put aside. . . (Adolescent with disability, Rwanda). INSTITUTIONAL: ‘‘For those who do not see, there is no information.’’ Adolescent with disability, Rwanda. ‘‘AIDS concerns us to, but we cannot walk to meet and discuss it.…		Social stigma and negative attitudes; untrained and insensitive health staff						0	0	0	0	0	0	0	1	0	0	0	0	0	0	0	0	0	0	0	0	0	0	0
38	row 72	Mushi 2012	Perceptions, social life, treatment and education gap of Tanzanian children with epilepsy: A community-based study	2012	Dimension 2	Academic (Journal article)	Perceptions about epilepsy	The aim of this study was to understand the sociocultural beliefs surrounding epilepsy, the effects of epilepsy on a child and their carers and the factors influencing their treatment and education in a rural African setting	Qualitative interviews & focus groups	Moderate trustworthiness; moderate relevance	Tanzania (rural)	Context of poverty	Mixed gender	Basic health care system in place	Caregivers of children with epilepsy	epilepsy	The cause of epilepsy was for the most part unknown by carers. Perceived causes included socio-cultural beliefs (influence of evil spirits, witchcraft and failing to follow traditions): We thought that it started because we have not observed some traditions. Some people inherit it from their family, or are cursed by an evil spirit.	Participants' explanation of epilepsy in children revealed that nearly all respondents defined epilepsy from a non-biomedical point of view: It's the disease of falling down. It is a fainting disease. Epilepsy in children was described from experience as a ‘bad illness’ with an emphasis on convulsions whose unexpectedness produced fear: I will explain according to what happened to my son; it is a…	MISTREATMENT: The diagnosis of epilepsy was mostly made by the medical team involved in the epilepsy project and the diagnosis had not been made prior to this consultation: She started to faint at age 2. I went to a nearest dispensary, the doctor told me that is normal for the kids, but she continue to faint; later I decided to take her to a health centre then doctor told me she might be epilepti…		Social stigma and negative attitudes. Lack of knowledge and use of traditional medicine.		This study highlights the need for better community education about epilepsy to reduce unhelpful or stigmatizing beliefs and to promote utilization of appropriate care				0	0	0	0	0	1	0	0	0	0	0	0	0	0	0	0	0	0	1	0	0	0	0
39	row 73	Mutamba 2013	Stereotypes on Nodding syndrome: responses of health workers in the affected region of northern Uganda	2013	Dimension 5	Academic (Journal article)	Percpeptions about nodding syndrom	To identify stereotypes and negative attitudes held by primary care health workers about nodding syndrome	Qualitative interviews & focus groups	Low trustworthiness; high relevance.	Uganda (rural)	Context of poverty	Mixed gender	Basic health care system in place	Rural health care workers	Nodding syndrom	NS is associated with evil spirits and curses, and is disabling, making the patient a burden to society	Nodding syndrome is 1) an incurable disease and 4) is a fatal illness	STRUCTURAL: Biased treatment of children with nodding syndrom		Attitudes and lack of knowledge						0	0	0	0	1	0	0	0	0	0	0	0	0	0	0	0	0	0	1	0	0	0	0
40	row 74	Mutua 2001	Prediction of School Enrolment of Children with Intellectual Disabilities in Kenya: The role of parents' expectations, beliefs, and education	2001	Dimension 3; dimension 2	Academic (Journal article)	Factors affecting the enrollment of disabled children in school	The purpose of this study was to develop a logistic regression model for the prediction of school enrolment of Kenyan children with intellectual disabilities	Logistic regression	High trustworthiness; moderate relevance	Kenya (rural & urban)	Context of poverty	two-third boys in sample	Provinces have some specialised schools	Caregivers of children with intelectual disability	Intellectual disability			STRUCTURAL: Not enrolling child in school		(a) expectations about social acceptance of their children with intellectual disabilities; (b) bias against educating children with intellectual disabilities; (c) level of education	(c) beliefs about segregated school option, (d) beliefs about the appropriateness of the child’s school education					0	0	0	1	0	0	0	0	0	0	0	0	0	0	0	0	0	0	0	0	0	0	0
41	row 75	Nakamanya et al	Maternal experiences of caring for an infant with neurological impairment after neonatal encephalopathy in Uganda: a qualitative study	2015	Dimension 2	Academic (Journal article)	Contexts of caregivers with disabled children	The study investigated maternal experiences of caring for a child affected by neurological impairment after neonatal encephalopathy (NE) (‘‘birth asphyxia’’) in Uganda	Qualitative interviews & focus groups	High trustworthiness; moderate relevance	Uganda (urban)	Context of poverty	Female caregivers	Study conducted in specilaised care center	Mothers of diabled children	Child affected by neurological impairment after neonatal encephalopathy (NE) (‘‘birth asphyxia’’)	Mothers had a wide range of beliefs regarding their children’s condition. Most commonly, mothers described the condition as ‘‘the baby got tired at birth’’ and partly attributed it to the traumatic delivery process they went through: Some mothers however attributed the condition to traditional causes like to ‘‘busobe’’ (literally translated as to err. Among the Baganda the condition is believed t…		VERBAL ABUSE: Such impairments attracted negative reactions from other people, causing stress to the mothers. Over half of the mothers (10/16) reported being stressed by negative actions, comments or isolation of the child. The 32-year-mother quoted above, who already had four older children, and who had had a child with a new partner described this feeling: They do talk about him [the child] bec…		Stigma and negative attitudes; lack of support from patner, family and community; traditional medicine (discussed not observed)	Supportive patners, family; medical institutions	Commmunity-based rehabilitation.				0	0	0	0	0	1	0	0	0	0	1	0	0	0	0	0	0	0	0	0	0	0	0
42	row 76	Sharkawy	Attitudes and practices of families and health care personnel toward children with epilepsy in Kilifi, Kenya	2006	Dimension 1	Academic (Journal article)	Attitude & practices toward epispsy	This study explores in depth the sociocultural environment of children with epilepsy, with a particular focus on describing attitudes and practices toward them. The aim was to investigate the underutilization of existing medical services with a view to using this information to improve service strategies.	Qualitative interviews & focus groups	High trustworthiness; moderate relevance	Kenya (rural)	This study was undertaken in Kilifi District, on the coast of Kenya. This is one of the poorest areas in Kenya, where the rural population are predominantly subsistence farmers and the town dwellers are involved in commercial activities, the hotel industry, and local administration. The population is predominantly the Mijikenda tribe, with the largest subtribe being Giriama.	Mixed	Access to services: It is worth noting that although medical services are available in Kilifi, they remain less accessible than traditional services, resulting in a preference for the latter. Families have to use transportation or walk a long distance to reach the hospitals and clinics where AEDs are available, making the nearby traditional healer or religious place (church or mosque) a simpler a…	The sample of children, parents, and grandparents came from, or were associated with, a population of 93 children identified as having active epilepssubtribe being Giriama.	Epilspsy	See abuse/RFs	Beliefs: external factors assumed to cause epilepsy: a. External causes involving physical contact; ‘‘They beat me on the head [then] I fit.’; ‘‘The mother is the one who is sick and she transmits it to the child.’’; ‘‘The amulets are supposed to scare the mother from having affairs with other men. If she does so and then; comes to breastfeed the child, the child will fit; ‘‘There could be the bi…	Attitudes/abuse: As expressed by families Positive ‘‘They ran to me and told me that she was fitting. When I reached there, a neighbour had assisted her. She took her to their home.’’ [M, I]a Negative ‘‘[They are] taken as mad children. They are labelled. They are considered lunatics, cannot play with others because other children are warned not to play with them.’’ [M, FGD] Lack of knowledge ‘‘T…		Risk factors: As in a previous study by Molyneux [16], responses to convulsions and the services that children with epilepsy received were linked to understanding the cause, in addition to practical and economic concerns. These included severity of the case, financial ability, distance, and intrahousehold decision making. Other contributing factors included religious beliefs, advice from others, …						0	0	0	0	0	1	0	0	0	0	0	0	0	0	0	0	0	0	1	0	0	0	0
																											2	2	3 contains some studies that were coded as blind and deaf as they included different types of impairments	6	2	7	2	20	3	3	3	1	8	5	6	2	8	5	9	8	2	1	4
[truncated: 53 more columns]
